# Supplementary material
Source: PubMed Central journal article supplement (PMC3440200)
Supplement: supp_pp.112.201541_201541Figure_S1.pdf [file supp_pp.112.201541_201541Figure_S1.pdf]

```

                *           20           *           40           *
AhDGAT3 : ----- : -
AtDGAT3 : ----- : -
AtDGAT1 : MAILDSAGVTIVTENGSGEFVLDLRLRRRKRSRSDSSNGLLLSGSDNNNSPDDVGA : 55
AtDGAT2 : ----- : -

                60           *           80           *           100           *
AhDGAT3 : -----M : 1
AtDGAT3 : ----- : -
AtDGAT1 : PADVDRDRIDSUVNDDAQGTANLAGDNNGGGDNNGGGGRGGEGRGNADATFTYRPS : 110
AtDGAT2 : ----- : -

                120           *           140           *           160
AhDGAT3 : EVSGAVLRNVTCPEFSVHVSERRRGDSCVTIPWRPKKAVVRCCEGSDSGHVQ : 56
AtDGAT3 : -----MEKEKKALKKKKAKVLRKSKNLDMPFSSIGG : 31
AtDGAT1 : VPAHRRRAESPLSDAIFKQSHAGLENLCVVVLTAAVNSRLIIEENLMKGGWLIRTD : 165
AtDGAT2 : -----MGGREFRAEHSNQFHSIIRAIWVG-----ATHIN----- : 32

                *           180           *           200           *           220
AhDGAT3 : YYGDEKKKENGSTAMLSSTKKKLRMLKKRVLFDDLQG-NLTWDRAMLLVQLEQVRA : 110
AtDGAT3 : -----LDPERAGLVGEDIQT-NTISEATEMLVQLEQLKA : 63
AtDGAT1 : FWFSSRSRLRDWPLFMCCISLSIFPLAAFTVEKLVLCQYISEPVVVFHIIITMTE : 220
AtDGAT2 : -----VALVLCSLIEFLPPSLSLMVLGLLSLFFFPIDHRS : 67

                *           240           *           260           *
AhDGAT3 : EEMELKKKRRQEKKEAKLKASIMNINPDCESSSSSSSSESESESESESECNEVVV : 165
AtDGAT3 : EEMILKKQRNEEK--AKAKAMKKKQEMDESSESSSSSSSDSCD-----KGVVV : 110
AtDGAT1 : VLYFVVVTLRQDSDFLSGVTMLMLLCIVWLKLVYAHSTSYDIRLANAADKANPE : 275
AtDGAT2 : KYGRKLARYIKKHCNYFFVSLYVEDYEAQPNRAYVFGYEPHSLPFIGVVVLC : 122

                280           *           300           *           320           *
AhDGAT3 : MKKNIKNGVAVAVADSRRKAEITMILYTSLVARVUSANHHHHNMLFVSRNNISV : 220
AtDGAT3 : MSS--RNKAKPVLELQPEATVATLPRIQEDDAISCKNTSEALQIALQTSDF : 162
AtDGAT1 : VSYVYSKSLAYFMVASILCYQPSYFRSACIRKGVVVARQFAKLIIFTGFMGHE : 330
AtDGAT2 : LTGFMPFENIKVLSAIFAFTYFPLRHIWTWLGLTASRKNFTSLDSSYSCVVE : 177

                340           *           360           *           380
AhDGAT3 : GSENGGLKNE-----NTAVITTEAHPQKRREVCMLG-----NKCK : 254
AtDGAT3 : SMANFGQTLK-----TVEAVSVVGLLNLNVEVCLG-----GRCK : 196
AtDGAT1 : QYKDFIVRNSKHPLNGDLLYAIERWLKLSVENLYVWLCMFYCFPHLWNLIAELL : 385
AtDGAT2 : GGWQETEFHMQ-----HDAENVFLSRRRGFURHAEQGG-----SPLVEVF : 216

                *           400           *           420           *           440
AhDGAT3 : KSGSIALLQSERVUGA-----EGGAAARVGGKCMG-NCKSAFNVRIQN : 298
AtDGAT3 : RSGGALLLDLQQRAM-----TGFEGSAACKCMG-NCRDGENVAVVK : 237
AtDGAT1 : CEGDREFYKIDWNKSVGDYWRMWNMFVHKMMVHLYFPFIRSLIPKTLAIIAF : 440
AtDGAT2 : CEGCQRVYKWKPKDCDL-----YLKLSRAHFTFCFWGVVFPSPFCRQ : 260

                *           460           *           480           *
AhDGAT3 : STADKIAEG-FNDSURVVEANPLCIQVAVRMLKPLWLRFFGNQESTNE----- : 345
AtDGAT3 : ETDQVMTD-----SVRTRSKTLCVGVGLQDVETIVTSEFFDECSREGLGSVSY-- : 285
AtDGAT1 : LVSAVHRELCAVPCCLFKLWAFLCMPQVPLFITNYVQERFGSTVGNMIFWFI : 495
AtDGAT2 : PMHVVVGKPF--IEVTRILNPTDEEIAKFRGQYVEALDLPFRHKRVRVYDLELKI : 313

                500           *           520
AhDGAT3 : ----- : -
AtDGAT3 : ----- : -
AtDGAT1 : FCIFGQPMCVLLLYVHDLMNKRGSMS : 520
AtDGAT2 : L----- : 314

```

**Figure S1.** Comparison of the deduced amino acid sequences of *Arachis hypogaea* *DGAT3* and *Arabidopsis DGAT1* (At2g19450), *DGAT2* (At3g51520) and *DGAT3* (At1g48300) genes. AtDGAT3 protein share 26% identity and 40% similarity with AhDGAT3, 7% identity and 18% similarity with AtDGAT1 and 5% identity and 22% similarity with AtDGAT2.
