# Supplementary material
Source: PubMed Central journal article supplement (PMC3440200)
Supplement: supp_pp.112.201541_201541Figure_S2.pdf [file supp_pp.112.201541_201541Figure_S2.pdf]

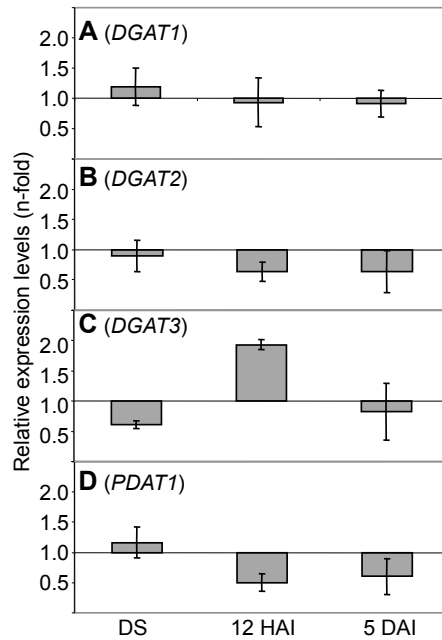

**Figure S2.** Quantitative gene expression profiles of TAG synthesis *DGAT1* (A), *DGAT2* (B), *DGAT3* (C) and *PDAT1* (D) genes in dry seeds (DS), 12-hour after imbibition (HAI) seeds and 5-day after imbibition (DAI) seedlings in *pxa1-1* relative to Col0.
