# Supplementary material
Source: PubMed Central journal article supplement (PMC3440200)
Supplement: supp_pp.112.201541_201541Figure_S3.pdf [file supp_pp.112.201541_201541Figure_S3.pdf]

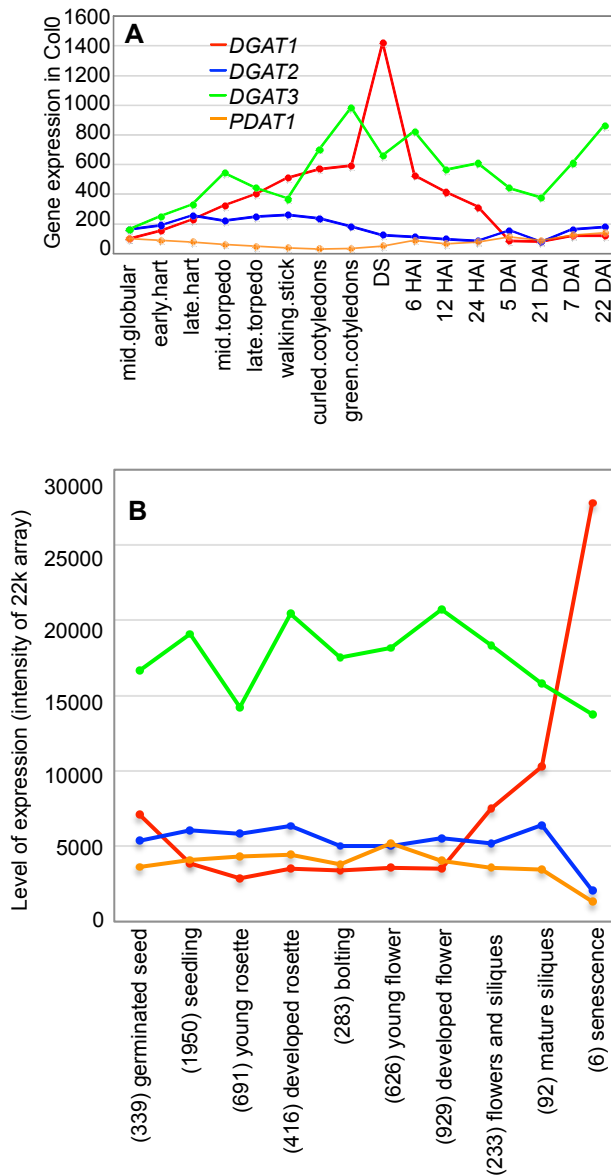

**Figure S3.** (A) Selected TAG synthesis gene expression levels in Col0 during seed development and seedling establishment using downloaded publicly available Affymetrix ATH-1 data. (B) Selected TAG synthesis gene expression levels across stages of development. The expression value indicated for a given stage of development is the average of expression of the sample number as indicated in brackets.
