# Supplementary material
Source: PubMed Central journal article supplement (PMC3440200)
Supplement: supp_pp.112.201541_201541Figure_S4.pdf [file supp_pp.112.201541_201541Figure_S4.pdf]

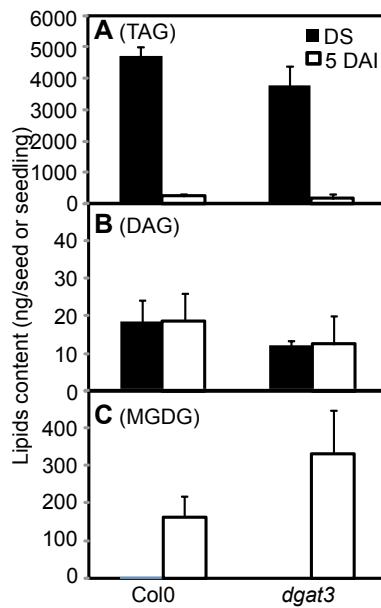

**Figure S4.** Total TAG (A), DAG (B) and MGDG (C) content from Col0 and *dgat3* dry seeds (DS) and 5-day after imbibition (DAI) seedlings. Values are means  $\pm$  SD of measurements from five separate batches of 50 seeds or 30 seedlings.
