# Supplementary material
Source: PubMed Central journal article supplement (PMC3440200)
Supplement: supp_pp.112.201541_201541Table_S1.pdf [file supp_pp.112.201541_201541Table_S1.pdf]

| Gene         | Locus Name | Sequence                                                                                                                                                                                                                            | Utility                                                        |
|--------------|------------|-------------------------------------------------------------------------------------------------------------------------------------------------------------------------------------------------------------------------------------|----------------------------------------------------------------|
| <i>CSY3</i>  | At2g42790  | LH27: 5' -CAAACCACACCGCAAAGAAT-3'<br>LH28: 5' -GCGGACAAACACCCTTAGAA-3'                                                                                                                                                              | QPCR<br>QPCR                                                   |
| <i>DGAT1</i> | At2g19450  | LH15: 5' -CATGAGCTATGCATCGCAGT-3'<br>LH16: 5' -CACCGTTGATAGCCAAACCT-3'<br>LH47: 5' -CACCATGGCGATTTTGGATTCT-3'<br>LH48: 5' -TCATGACATCGATCCTTTTCGG-3'                                                                                | QPCR<br>QPCR<br>Cloning<br>Cloning                             |
| <i>DGAT2</i> | At3g05320  | LH25: 5' -TACCTTGGAGCTGGATTTGG -3'<br>LH26: 5' -TCTTGTGCAAGACGACATGTAA -3'                                                                                                                                                          | QPCR<br>QPCR                                                   |
| <i>DGAT3</i> | At1g48300  | LH19: 5' -GCAAGAACACCAGTGAAGCA-3'<br>LH20: 5' -TGAAACCGCTTCTACCGTCT-3'<br>LH35: 5' - CACCATGGAGAAGGAGAAGAAG -3'<br>LH36: 5' -TCAATATGAGACAGAACCGAGTC -3'<br>LH9: 5' -CGCTTAAGGCTCAAGTCACAC-3'<br>LH10: 5' -TCACAACTCTAACGTTTGGGC-3' | QPCR<br>QPCR<br>Cloning<br>Cloning<br>Genotyping<br>Genotyping |
| <i>PDAT1</i> | At5g13640  | LH21: 5' -ACAGTTGCATCCCCTTTTCAG -3'<br>LH22: 5' -ACATGTACCCGGCACTTAGG-3'                                                                                                                                                            | QPCR<br>QPCR                                                   |

**Table S1.** Locus names and sequences of primers pairs used in the present study.
